Articles of interest in other COB journals

From *Journal of Cell Science*

**EGFR-dependent migration of glial cells is mediated by reorganisation of N-cadherin**

Anne Rappl, Guido Piontek and Jürgen Schlegel

Rappl, A. et al. 2008. *J. Cell Sci.* doi:10.1242/jcs.027995

**Identification of GW182 and its novel isoform TNGW1 as translational repressors in Ago2-mediated silencing**

Songqing Li, Shang L. Lian, Joanna J. Moser, Mark L. Fritzler, Marvin J. Fritzler, Minoru Satoh and Edward K. L. Chan

Li, S. et al. 2008. *J. Cell Sci.* doi:10.1242/jcs.036905
